# Supplementary material
Source: PubMed Central journal article supplement (PMC3870720)
Supplement: 1315775110_pnas.201315775SI.pdf [file 1315775110_pnas.201315775SI.pdf]

# Supporting Information

Andersen et al. 10.1073/pnas.1315775110

## SI Materials and Methods

**Site-Directed Mutagenesis.** Mutant cDNAs were constructed using the QuikChange Site-Directed Mutagenesis kit (Stratagene) and then confirmed by sequencing the entire coding region (1). BOSC 23 cells, modified HEK 293 cells, were transfected by calcium phosphate precipitation as described previously (2). The ratios for coexpression of two different subunits are expressed in weight. Expression of human  $\alpha 7$  in mammalian cells lines requires cotransfection with the intracellular chaperone Ric-3 (3). Ric-3 and  $\alpha 7$  cDNAs were cotransfected at a ratio of 12:1 (wt: wt), with the total  $\alpha 7$  cDNA ranging from  $\sim 0.4$ – $1 \mu\text{g}$  for a 35-mm culture dish (1, 4). All transfections were carried out for about 12 h in DMEM with 10% FBS and were terminated by exchanging the medium. Cells were used for single-channel recordings 2–4 d after transfection. To facilitate identification of transfected cells, a separate plasmid encoding green fluorescent protein was included in all transfections.

**Single-Channel Recordings.** Recordings were obtained in the cell-attached patch configuration essentially as described previously (1). Patch pipettes were pulled from glass capillary tubes and coated with Sylgard (Dow Corning). Single-channel currents were digitized at 5- to 10- $\mu\text{s}$  intervals, and low-pass filtered to 10 kHz using an Axopatch 200 B patch-clamp amplifier (Molecular

Devices). To dissect amplitude classes, the membrane potential was  $-70 \text{ mV}$  for  $\alpha 7$  and  $-120 \text{ mV}$  for  $\alpha 7$ -5HT<sub>3</sub>A receptors (5). Bursts of channel openings were identified as a series of closely separated openings preceded and followed by closings longer than a critical duration, which was taken as the point of intersection between the first and second briefest components in the closed-time histogram for bursts of  $\alpha 7$  ( $\sim 300$ – $500 \mu\text{s}$ ), second and third closed components for bursts of  $\alpha 7$ TSLMF ( $\sim 1$ – $2 \text{ ms}$ ), second and third closed components for bursts of  $\alpha 7$  in the presence of 5-HI ( $\sim 1$ – $3 \text{ ms}$ ), and second and third closed components for bursts of  $\alpha 7$ -5HT<sub>3</sub>A ( $\sim 2$ – $5 \text{ ms}$ ).

**Statistics.** Experimental data are shown as mean  $\pm$  SD. Statistical comparisons were done using the Student *t* test or one-way ANOVA with Bonferroni's multiple comparison post test. A level of  $P < 0.05$  was considered significant.

**Single-Channel Simulations.** Simulations of single-channel events were performed using the QuB suite ([www.qub.buffalo.edu](http://www.qub.buffalo.edu); State University of New York, Buffalo). For the simulations, we used a kinetic model that describes the two open components observed experimentally. Open-channel amplitude was fixed at  $10 \pm 0.6 \text{ pA}$ .

1. Bouzat C, Bartos M, Corradi J, Sine SM (2008) The interface between extracellular and transmembrane domains of homomeric Cys-loop receptors governs open-channel lifetime and rate of desensitization. *J Neurosci* 28(31):7808–7819.
2. Bouzat C, Bren N, Sine SM (1994) Structural basis of the different gating kinetics of fetal and adult acetylcholine receptors. *Neuron* 13(6):1395–1402.
3. Williams ME, et al. (2005) Ric-3 promotes functional expression of the nicotinic acetylcholine receptor  $\alpha 7$  subunit in mammalian cells. *J Biol Chem* 280(2): 1257–1263.
4. daCosta CJ, Free CR, Corradi J, Bouzat C, Sine SM (2011) Single-channel and structural foundations of neuronal  $\alpha 7$  acetylcholine receptor potentiation. *J Neurosci* 31(39): 13870–13879.
5. Rayes D, De Rosa MJ, Sine SM, Bouzat C (2009) Number and locations of agonist binding sites required to activate homomeric Cys-loop receptors. *J Neurosci* 29(18): 6022–6032.

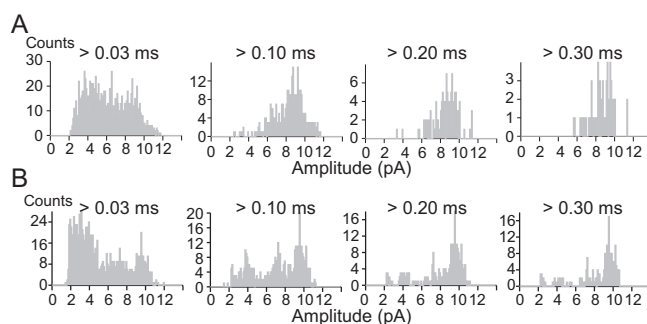

**Fig. S1.** Amplitude histograms for human  $\alpha 7$  and  $\alpha 7$ TSLMF. Single-channel currents from  $\alpha 7$  (A) or  $\alpha 7$ TSLMF (B) were recorded at  $-70 \text{ mV}$  membrane potential. Typical amplitude histograms constructed for opening events longer than 0.03, 0.1, 0.2, or 0.3 ms are shown. The proportion of submaximal amplitude openings is systematically reduced as the minimal duration for openings included in the amplitude histogram is increased; and the majority of openings longer than 0.3 ms show maximal amplitude, suggesting that briefer events cannot be fully resolved. The percentage of total opening events is reduced to 23%, 7%, and 4% ( $\alpha 7$ ) and to 45%, 28%, and 22% ( $\alpha 7$ TSLMF) in histograms restricted to opening events longer than 0.10, 0.20, and 0.30 ms, respectively. Although most openings are grouped in the highest amplitude class when the histograms are restricted to events longer than 0.2–0.3 ms, the reduced number of opening events for  $\alpha 7$  makes the application of the electrically fingerprinting strategy technically unfeasible.



h $\alpha$ 7 QPPEGDPDLAKILEEVRYIANRFRCD**E**SEAVCSEWK  
h $\alpha$ 7<sub>LC</sub> QPPEGDPDLAKILEEVRYIANRFR**C**R**D**ESRAVCREWK

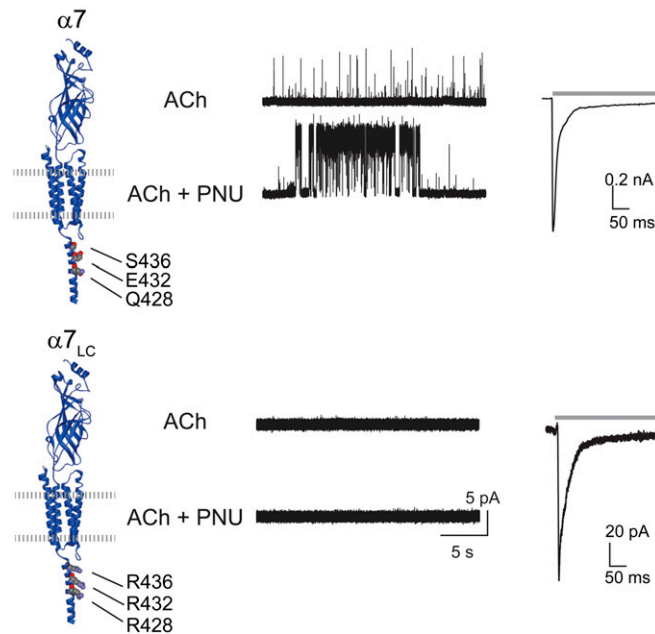

**Fig. 54.** Low-conductance form of human  $\alpha$ 7. Arginine residues located in the cytoplasmic linker spanning the M3 and M4 domains are responsible for the low conductance of 5-HT<sub>3</sub>A receptors (1–3). The comparison of amino acid sequence shows that negative and noncharged residues are present at equivalent positions in  $\alpha$ 7, which shows high conductance (Top). The figure shows homology model of a single  $\alpha$ 7 subunit based on the Torpedo acetylcholine receptor structure (PDB ID code: 2BG9), with the triple mutation that leads to the low-conductance form of  $\alpha$ 7 ( $\alpha$ 7<sub>LC</sub>). Due to the low conductance, single channels are not detected in cell-attached patches in the presence of 100  $\mu$ M ACh ( $n = 10$ ) and even in the presence of 100  $\mu$ M ACh plus 1  $\mu$ M PNU ( $n = 5$ ) (Middle). (Right) Although smaller in amplitude, macroscopic responses of  $\alpha$ 7<sub>LC</sub> to 1 mM ACh show fast onset and desensitization, identical to those of wild-type  $\alpha$ 7 (see the different scales for representative currents).

1. Rayes D, De Rosa MJ, Sine SM, Bouzat C (2009) Number and locations of agonist binding sites required to activate homomeric Cys-loop receptors. *J Neurosci* 29(18):6022–6032.
2. Rayes D, Spitzmaul G, Sine SM, Bouzat C (2005) Single-channel kinetic analysis of chimeric alpha7-5HT3A receptors. *Mol Pharmacol* 68(5):1475–1483.
3. Kelley SP, Dunlop JI, Kirkness EF, Lambert JJ, Peters JA (2003) A cytoplasmic region determines single-channel conductance in 5-HT3 receptors. *Nature* 424(6946):321–324.



**Table S2. Open and burst durations from receptors containing different number of wild-type and low-conductance  $\alpha 7$  subunits**

| Schemes for receptors of different amplitude classes |                                                   |             |              |             |             |
|------------------------------------------------------|---------------------------------------------------|-------------|--------------|-------------|-------------|
|                                                      | $\alpha 7$ TSLMF + $\alpha 7$ TSLMF <sub>LC</sub> |             |              |             |             |
| Amplitude class, pA                                  | 2.3 ± 0.2                                         | 3.7 ± 0.3   | 6.0 ± 0.3    | 8.1 ± 0.2   | 10.0 ± 0.2  |
| O <sub>L</sub> , ms                                  | 0.92 ± 0.10                                       | 0.71 ± 0.12 | 0.74 ± 0.231 | 0.82 ± 0.26 | 0.92 ± 0.24 |
| $\tau_{burst}$ , ms                                  | 1.00 ± 0.32                                       | 1.15 ± 0.51 | 1.38 ± 0.87  | 1.20 ± 0.40 | 1.24 ± 0.31 |
| n                                                    | 5                                                 | 5           | 6            | 6           | 6           |
| $\alpha 7$ + $\alpha 7_{LC}$ + 5-HI                  |                                                   |             |              |             |             |
| Amplitude class, pA                                  | nm                                                | 4.4 ± 0.2   | 6.4 ± 0.2    | 8.3 ± 0.4   | 10.1 ± 0.3  |
| O <sub>L</sub> , ms                                  | nm                                                | 1.50 ± 0.30 | 1.80 ± 0.50  | 2.40 ± 0.50 | 2.40 ± 0.80 |
| $\tau_{burst}$ , ms                                  | nm                                                | 5.40 ± 1.70 | 5.00 ± 1.30  | 5.50 ± 1.40 | 6.00 ± 1.60 |
| n                                                    | 7                                                 | 9           | 5            | 6           | 3           |

Single channels were recorded in the presence of 100  $\mu$ M ACh from cells expressing the subunit combination shown. For  $\alpha 7$  and  $\alpha 7_{LC}$ , 2 mM 5-HI was also present in the pipette solution. Amplitude classes are expressed in pA (−70 mV). The table shows the mean  $\pm$  SD values for *n* different recordings for each condition. O<sub>L</sub> corresponds to the longest duration component obtained from the corresponding open time histogram, and  $\tau_{burst}$  corresponds to the mean duration of bursts. Nonstatistically significant differences are observed in the mean values among amplitude classes for the same condition. nm, not measured. In the schemes, high- and low-conductance subunits are shown as black and gray circles, respectively. The arrows indicate functional binding sites.

**Table S3. Channel lifetime of  $\alpha 7$  channels carrying one or five functional binding sites**

| Schemes for receptors with different number of binding sites | No. of binding sites                              |                                                         |
|--------------------------------------------------------------|---------------------------------------------------|---------------------------------------------------------|
|                                                              | 5                                                 | 1                                                       |
| Subunits                                                     | $\alpha 7$ TSLMF + $\alpha 7$ TSLMF <sub>LC</sub> | $\alpha 7$ TSLMF-Y188T + $\alpha 7$ TSLMF <sub>LC</sub> |
| O <sub>L</sub> , ms                                          | 0.82 ± 0.26                                       | 0.72 ± 0.10                                             |
| $\tau_{burst}$ , ms                                          | 1.20 ± 0.40                                       | 1.10 ± 0.55                                             |
| n                                                            | 6                                                 | 8                                                       |
| Subunits                                                     | $\alpha 7$ + $\alpha 7_{LC}$ + 5-HI               | $\alpha 7$ -Y188T + $\alpha 7_{LC}$ + 5-HI              |
| O <sub>L</sub> , ms                                          | 2.30 ± 0.50                                       | 2.20 ± 0.70                                             |
| $\tau_{burst}$ , ms                                          | 5.40 ± 1.40                                       | 5.10 ± 1.00                                             |
| n                                                            | 12                                                | 7                                                       |

Single channels were recorded from cells transfected with the low-conductance forms of  $\alpha 7$ TSLMF or  $\alpha 7$  subunits together with the wild-type conductance subunit carrying (1 functional binding site) or not (5 functional binding sites) the Y188T mutation. The 8-pA channels recorded from cells transfected with  $\alpha 7$ TSLMF and  $\alpha 7$ TSLMF<sub>LC</sub> or  $\alpha 7$  and  $\alpha 7_{LC}$  combinations contain five functional binding sites whereas those from cells transfected with  $\alpha 7$ TSLMF-Y188T and  $\alpha 7$ TSLMF<sub>LC</sub> or  $\alpha 7$ -Y188T and  $\alpha 7_{LC}$  contain only one functional binding site. O<sub>L</sub> corresponds to the longest duration component, and  $\tau_{burst}$  corresponds to the mean burst duration. Data are expressed as the mean  $\pm$  SD of *n* different recordings for each condition. ACh, 100  $\mu$ M; 5-HI, 2 mM. In the schemes, LC subunits are shown in gray, and Y188T mutation is represented by a small black circle. The arrows indicate functional binding sites.

**Table S4. Open and burst duration of  $\alpha 7$  channels containing different number of functional binding sites activated by ACh and potentiated by 5-HI**

| Schemes for receptors with different number of binding sites | No. of binding sites                                                              |                                                                                   |                                                                                   |                                                                                     |                                                                                     |
|--------------------------------------------------------------|-----------------------------------------------------------------------------------|-----------------------------------------------------------------------------------|-----------------------------------------------------------------------------------|-------------------------------------------------------------------------------------|-------------------------------------------------------------------------------------|
|                                                              | 1                                                                                 | 2                                                                                 | 3                                                                                 | 4                                                                                   | 5                                                                                   |
|                                                              |  |  |  |  |  |
| $O_L$ , ms                                                   | $2.20 \pm 0.70$                                                                   | $1.90 \pm 0.43$                                                                   | $1.80 \pm 0.57$                                                                   | $2.48 \pm 0.70$                                                                     | $2.70 \pm 0.30$                                                                     |
| $\tau_{burst}$ , ms                                          | $5.10 \pm 1.00$                                                                   | $4.70 \pm 0.95$                                                                   | $5.50 \pm 2.00$                                                                   | $6.26 \pm 1.40$                                                                     | $6.20 \pm 1.80$                                                                     |
| $n$                                                          | 7                                                                                 | 9                                                                                 | 5                                                                                 | 6                                                                                   | 4                                                                                   |

We measured single-channel activity from cells transfected with  $\alpha 7$ -Y188T and  $\alpha 7_{LC}$  or the reverse combination,  $\alpha 7$  and  $\alpha 7_{LC}$ -Y188T, to obtain pentameric arrangements containing different numbers of active binding sites. The table shows the mean  $\pm$  SD of the duration of the slowest open component ( $O_L$ ) and burst ( $\tau_{burst}$ ). ACh, 100  $\mu$ M; 5-HI, 2 mM.  $n$ , Number of patches for each condition. LC subunits are shown in gray, and Y188T mutation is shown by a small black circle. The arrows indicate functional binding sites. Nonstatistically significant differences are observed in the mean values among amplitude classes.
